# Supplementary material
Source: publisher site journal article supplement (https://static.cambridge.org/content/id/urn:cambridge.org:id:article:S1935789320000385/resource/name/S1935789320000385supp001.docx)
Supplement: Supplementary file 1 [file S1935789320000385supp001.docx]

Table. 1 Major disaster in Uttarakhand over last 20 years

| **Year** | **Nature of Disaster** | **Location** | **Deaths** |
| --- | --- | --- | --- |
| 1998 | Land slide | Mansoona village, Chamoli | 69 |
| 1999 | Earthquake | Chamoli | 110 |
| 2002 | Land slide | Budhakedar, Tehri | 28 |
| 2003 | Land slide | Varunavat, Uttarkashi |  |
| 2010 | Cloud burst, land slide | Uttarkashi, Chamoli, Pithoragarh & Rudraprayag | 65 |
| 2012 | Cloud burst | Assiganga & Bhagirathi valley, Uttarkashi | 39 |
| 2012 | Land slide | Ukkimath, Rudraprayag | 76 |
| 2013 | Flash flood, land slide | 12 districts of Uttarakhand | 5748 |

Table 2: Trauma Teams’ composition

|  | Doctor(s) | Nurse(s) |
| --- | --- | --- |
| Triage team | 1 | 2 |
| Red team | 2 | 6 |
| Yellow team | 2 | 6 |
| Green team | 1 | 1 |

Table 3: Management efficiency in respective zones

| Zone | Patients received | Managed well | Mismanaged |
| --- | --- | --- | --- |
| Red | 10 | 4 | 6 |
| Yellow | 12 | 8 | 4 |
| Green | 8 | 8 | 0 |
